# Supplementary material
Source: MDPI journal article supplement (https://www.mdpi.com/2571-6131/6/4/141)
Supplement: s1 [file s1]

## Supplementary Information

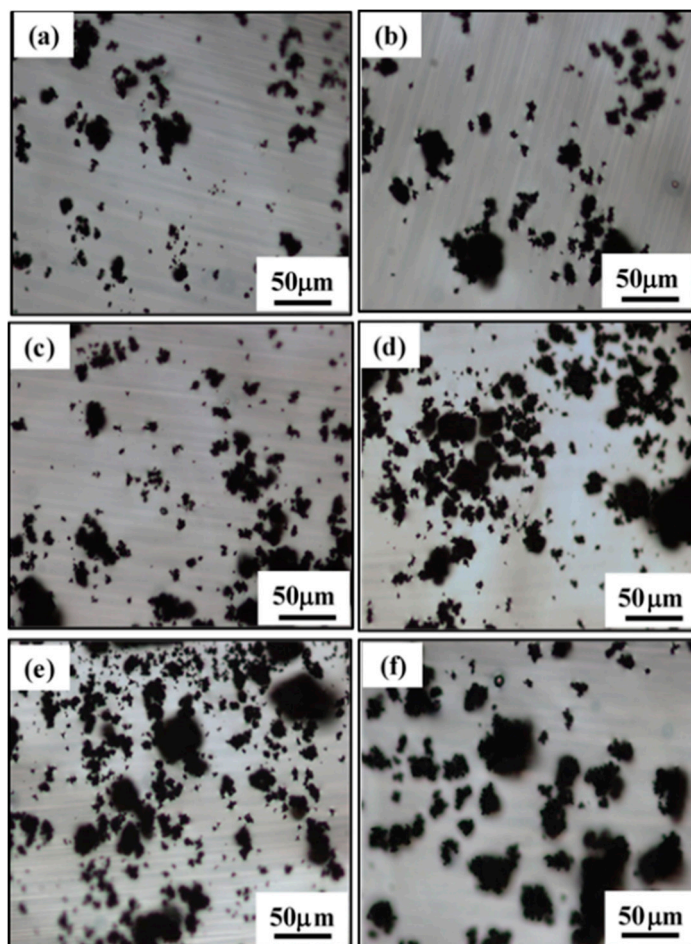

**Figure S1.** OM images of (a) as-received powder and the  $\text{Y}_{3.92}\text{SiAlO}_8\text{N}:0.08\text{Tb}^{3+}$  powders calcined at the temperatures of (b) 1300, (c) 1400, (d) 1500, (e) 1600, and (f) 1650 °C.

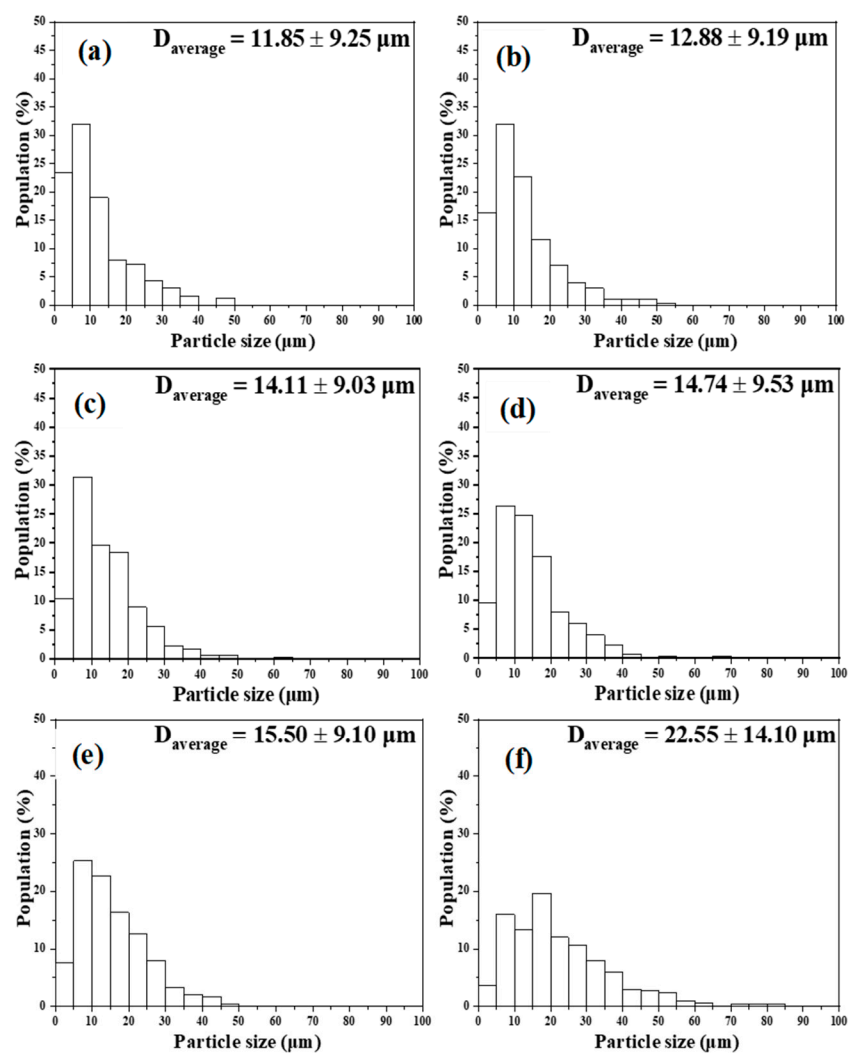

**Figure S2.** Particle size distributions of (a) as-received powder and the  $\text{Y}_{3.92}\text{SiAlO}_8\text{N}:0.08\text{Tb}^{3+}$  powders calcined at the temperatures of (b)1300, (c) 1400, (d) 1500, (e) 1600, and (f) 1650  $^{\circ}\text{C}$ .

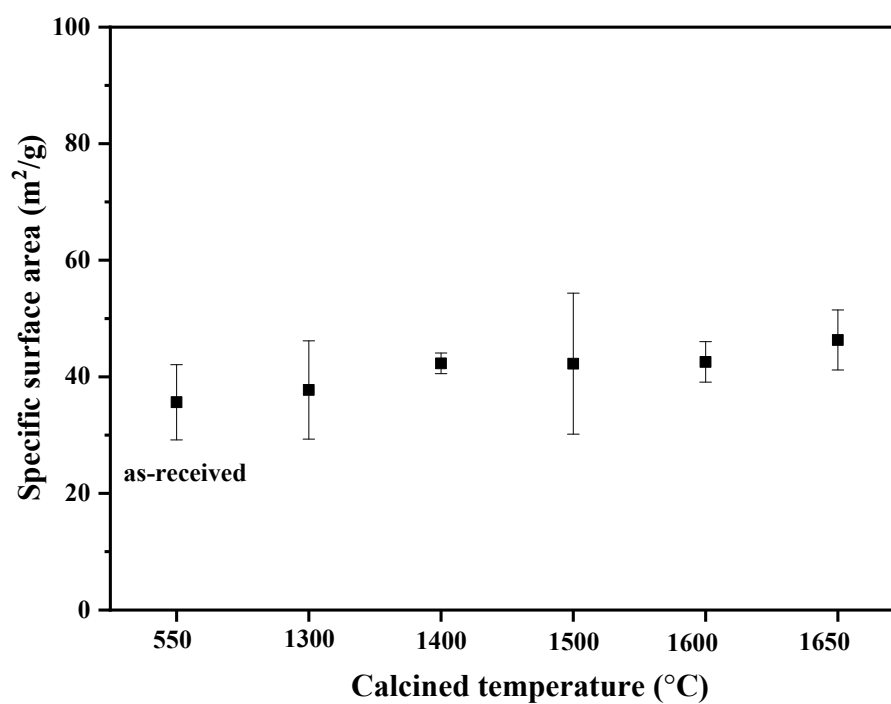

**Figure S3.** Correlation between specific surface area as a function of calcination temperature.

**Table S1.** The phase distribution of different temperature calcined  $\text{Y}_{3.92}\text{SiAlO}_8\text{N}:0.08\text{Tb}^{3+}$  phosphor powders.

| Phase<br>Temperature | $\text{Y}_4\text{SiAlO}_8\text{N}$ | Tb | $\text{Y}_2\text{SiO}_7$ |
|----------------------|------------------------------------|----|--------------------------|
| 1300 °C              | ✓                                  | ✓  |                          |
| 1400 °C              | ✓                                  | ✓  |                          |
| 1500 °C              | ✓                                  | ✓  |                          |
| 1600 °C              | ✓                                  | ✓  |                          |
| 1650 °C              | ✓                                  | ✓  | ✓                        |
